# Supplementary material for: A Study of 3D-Printable Reinforced Composite Resin: PMMA Modified with Silver Nanoparticles Loaded Cellulose Nanocrystal
Source: MDPI journal article supplement (doi:10.3390/ma11122444), 2018-12-03

SET BASETEXTDIRECTION=AUTOMATIC TABLERENDER=light ROWSBREAK=100  
 SUMMARY=None TOLERANCE=1 CELLSBREAK=10000 TLook=None Printback=On  
 Locale=OSLOCALE MIOUTPUT=[observed imputed pooled diagnostics] OLang=English  
 Unicode=Yes TFit=Both.  
 ONEWAY VAR00001 BY CNCsAg  
 /STATISTICS DESCRIPTIVES HOMOGENEITY  
 /PLOT MEANS  
 /MISSING ANALYSIS  
 /POSTHOC=BONFERRONI ALPHA(0.05).

## Oneway

| Notes                  |                                |                                                                                                                                                 |
|------------------------|--------------------------------|-------------------------------------------------------------------------------------------------------------------------------------------------|
| Output Created         |                                | 22-NOV-2018 11:30:29                                                                                                                            |
| Comments               |                                |                                                                                                                                                 |
| Input                  | Data                           | C:\Users\Beogene\Desktop\2.sav                                                                                                                  |
|                        | Active Dataset                 |                                                                                                                                                 |
|                        | Filter                         | <none>                                                                                                                                          |
|                        | Weight                         | <none>                                                                                                                                          |
|                        | Split File                     | <none>                                                                                                                                          |
|                        | N of Rows in Working Data File | 36                                                                                                                                              |
| Missing Value Handling | Definition of Missing          | User-defined missing values are treated as missing.                                                                                             |
|                        | Cases Used                     | Statistics for each analysis are based on cases with no missing data for any variable in the analysis.                                          |
| Syntax                 |                                | ONEWAY VAR00001 BY CNCsAg<br>/STATISTICS DESCRIPTIVES<br>HOMOGENEITY<br>/PLOT MEANS<br>/MISSING ANALYSIS<br>/POSTHOC=BONFERRONI<br>ALPHA(0.05). |
| Resources              | Processor Time                 | 00:00:00.49                                                                                                                                     |
|                        | Elapsed Time                   | 00:00:00.65                                                                                                                                     |

## Descriptives

concentration of S aureus

|       | N  | Mean      | Std. Deviation | Std. Error | 95% Confidence Interval for Mean |             |
|-------|----|-----------|----------------|------------|----------------------------------|-------------|
|       |    |           |                |            | Lower Bound                      | Upper Bound |
| .00   | 3  | 13.738409 | .6365656       | .3675213   | 12.157092                        | 15.319725   |
| .05   | 3  | 6.618381  | .0299828       | .0173106   | 6.543900                         | 6.692863    |
| .10   | 3  | .232922   | .0108879       | .0062861   | .205875                          | .259969     |
| .15   | 3  | .169822   | .0023759       | .0013717   | .163920                          | .175724     |
| .20   | 3  | .150617   | .0163318       | .0094292   | .110047                          | .191188     |
| .25   | 3  | .070370   | .0381075       | .0220014   | -.024294                         | .165035     |
| Total | 18 | 3.496754  | 5.3064750      | 1.2507482  | .857906                          | 6.135601    |

### Descriptives

concentration of S aureus

|       | Minimum | Maximum |
|-------|---------|---------|
| .00   | 13.2535 | 14.4593 |
| .05   | 6.5971  | 6.6527  |
| .10   | .2247   | .2453   |
| .15   | .1671   | .1712   |
| .20   | .1321   | .1630   |
| .25   | .0416   | .1136   |
| Total | .0416   | 14.4593 |

### Test of Homogeneity of Variances

concentration of S aureus

| Levene Statistic | df1 | df2 | Sig. |
|------------------|-----|-----|------|
| 11.026           | 5   | 12  | .000 |

### ANOVA

concentration of S aureus

|                | Sum of Squares | df | Mean Square | F        | Sig. |
|----------------|----------------|----|-------------|----------|------|
| Between Groups | 477.882        | 5  | 95.576      | 1405.679 | .000 |
| Within Groups  | .816           | 12 | .068        |          |      |
| Total          | 478.698        | 17 |             |          |      |

## Post Hoc Tests

### Multiple Comparisons

Dependent Variable: concentration of S aureus

Bonferroni

| (I) CNCsAg | (J) CNCsAg | Mean<br>Difference (I-J) | Std. Error | Sig.  | 95% Confidence Interval |             |
|------------|------------|--------------------------|------------|-------|-------------------------|-------------|
|            |            |                          |            |       | Lower Bound             | Upper Bound |
| .00        | .05        | 7.1200274 <sup>*</sup>   | .2129052   | .000  | 6.343160                | 7.896895    |
|            | .10        | 13.5054870 <sup>*</sup>  | .2129052   | .000  | 12.728619               | 14.282355   |
|            | .15        | 13.5685871 <sup>*</sup>  | .2129052   | .000  | 12.791719               | 14.345455   |
|            | .20        | 13.5877915 <sup>*</sup>  | .2129052   | .000  | 12.810924               | 14.364659   |
|            | .25        | 13.6680384 <sup>*</sup>  | .2129052   | .000  | 12.891171               | 14.444906   |
| .05        | .00        | -7.1200274 <sup>*</sup>  | .2129052   | .000  | -7.896895               | -6.343160   |
|            | .10        | 6.3854595 <sup>*</sup>   | .2129052   | .000  | 5.608592                | 7.162327    |
|            | .15        | 6.4485597 <sup>*</sup>   | .2129052   | .000  | 5.671692                | 7.225427    |
|            | .20        | 6.4677641 <sup>*</sup>   | .2129052   | .000  | 5.690896                | 7.244632    |
|            | .25        | 6.5480110 <sup>*</sup>   | .2129052   | .000  | 5.771143                | 7.324879    |
| .10        | .00        | -13.5054870 <sup>*</sup> | .2129052   | .000  | -14.282355              | -12.728619  |
|            | .05        | -6.3854595 <sup>*</sup>  | .2129052   | .000  | -7.162327               | -5.608592   |
|            | .15        | .0631001                 | .2129052   | 1.000 | -.713768                | .839968     |
|            | .20        | .0823045                 | .2129052   | 1.000 | -.694563                | .859172     |
|            | .25        | .1625514                 | .2129052   | 1.000 | -.614316                | .939419     |
| .15        | .00        | -13.5685871 <sup>*</sup> | .2129052   | .000  | -14.345455              | -12.791719  |
|            | .05        | -6.4485597 <sup>*</sup>  | .2129052   | .000  | -7.225427               | -5.671692   |
|            | .10        | -.0631001                | .2129052   | 1.000 | -.839968                | .713768     |
|            | .20        | .0192044                 | .2129052   | 1.000 | -.757663                | .796072     |
|            | .25        | .0994513                 | .2129052   | 1.000 | -.677416                | .876319     |
| .20        | .00        | -13.5877915 <sup>*</sup> | .2129052   | .000  | -14.364659              | -12.810924  |
|            | .05        | -6.4677641 <sup>*</sup>  | .2129052   | .000  | -7.244632               | -5.690896   |
|            | .10        | -.0823045                | .2129052   | 1.000 | -.859172                | .694563     |
|            | .15        | -.0192044                | .2129052   | 1.000 | -.796072                | .757663     |
|            | .25        | .0802469                 | .2129052   | 1.000 | -.696621                | .857115     |
| .25        | .00        | -13.6680384 <sup>*</sup> | .2129052   | .000  | -14.444906              | -12.891171  |
|            | .05        | -6.5480110 <sup>*</sup>  | .2129052   | .000  | -7.324879               | -5.771143   |
|            | .10        | -.1625514                | .2129052   | 1.000 | -.939419                | .614316     |
|            | .15        | -.0994513                | .2129052   | 1.000 | -.876319                | .677416     |
|            | .20        | -.0802469                | .2129052   | 1.000 | -.857115                | .696621     |

\*. The mean difference is significant at the 0.05 level.

## Means Plots

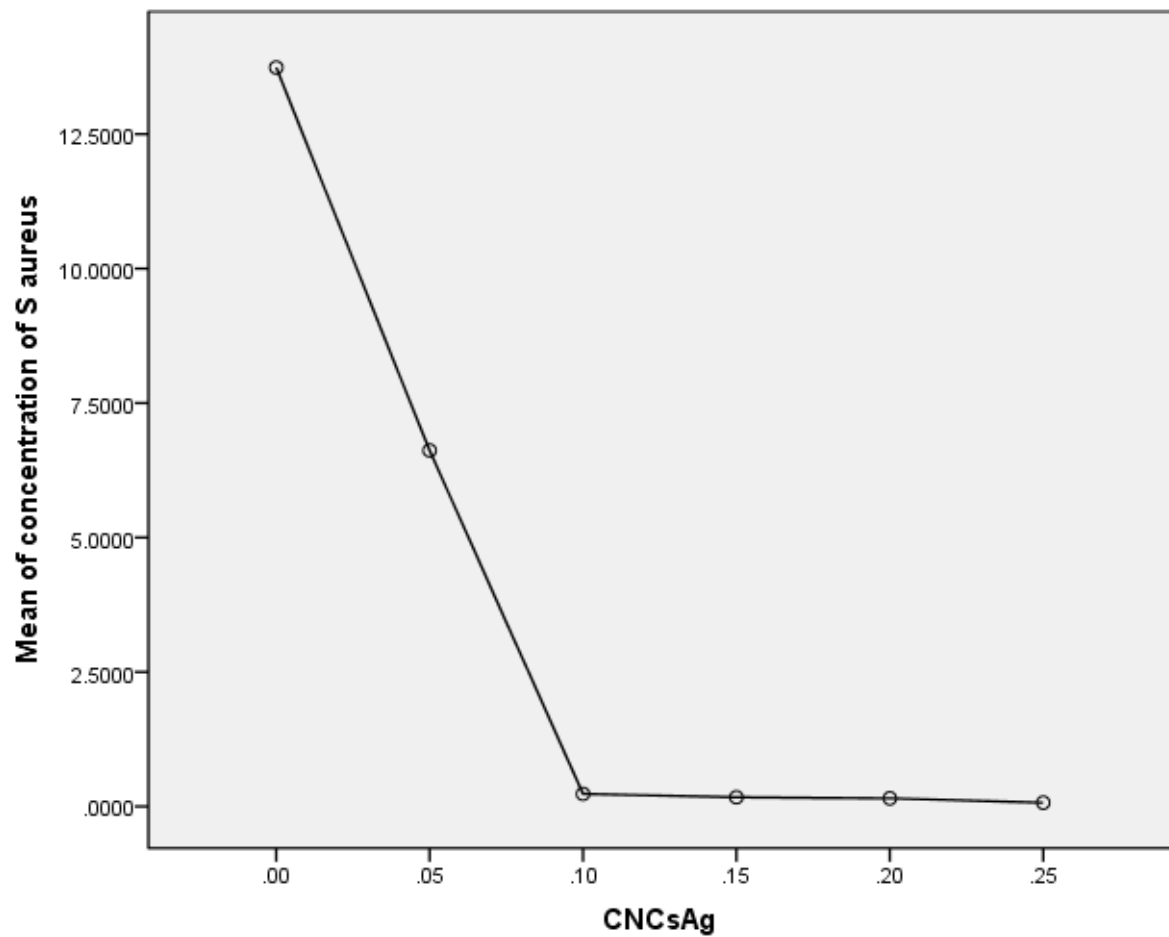

```
ONEWAY VAR00002 BY CNCsAg
/STATISTICS DESCRIPTIVES HOMOGENEITY
/PLOT MEANS
/MISSING ANALYSIS
/POSTHOC=BONFERRONI ALPHA(0.05).
```

## Oneway

### Notes

|                        |                                                                                                                                                 |                                                                                                        |
|------------------------|-------------------------------------------------------------------------------------------------------------------------------------------------|--------------------------------------------------------------------------------------------------------|
| Output Created         | 22-NOV-2018 11:31:06                                                                                                                            |                                                                                                        |
| Comments               |                                                                                                                                                 |                                                                                                        |
| Input                  | Data                                                                                                                                            | C:\Users\Beogene\Desktop\ 2.sav                                                                        |
|                        | Active Dataset                                                                                                                                  |                                                                                                        |
|                        | Filter                                                                                                                                          | <none>                                                                                                 |
|                        | Weight                                                                                                                                          | <none>                                                                                                 |
|                        | Split File                                                                                                                                      | <none>                                                                                                 |
|                        | N of Rows in Working Data File                                                                                                                  | 36                                                                                                     |
| Missing Value Handling | Definition of Missing                                                                                                                           | User-defined missing values are treated as missing.                                                    |
|                        | Cases Used                                                                                                                                      | Statistics for each analysis are based on cases with no missing data for any variable in the analysis. |
| Syntax                 | ONEWAY VAR00002 BY CNCsAg<br>/STATISTICS DESCRIPTIVES<br>HOMOGENEITY<br>/PLOT MEANS<br>/MISSING ANALYSIS<br>/POSTHOC=BONFERRONI<br>ALPHA(0.05). |                                                                                                        |
| Resources              | Processor Time                                                                                                                                  | 00:00:00.49                                                                                            |
|                        | Elapsed Time                                                                                                                                    | 00:00:00.61                                                                                            |

### Descriptives

concentration of E coli

|     | N | Mean      | Std. Deviation | Std. Error | 95% Confidence Interval for Mean |             |
|-----|---|-----------|----------------|------------|----------------------------------|-------------|
|     |   |           |                |            | Lower Bound                      | Upper Bound |
| .00 | 3 | 74.269113 | 2.9580340      | 1.7078217  | 66.920949                        | 81.617277   |
| .05 | 3 | 45.655454 | 2.3085309      | 1.3328310  | 39.920745                        | 51.390162   |
| .10 | 3 | 1.476045  | .0536985       | .0310029   | 1.342650                         | 1.609439    |
| .15 | 3 | 1.150357  | .1258135       | .0726385   | .837819                          | 1.462895    |
| .20 | 3 | .680938   | .0784649       | .0453017   | .486020                          | .875855     |

|       |    |           |            |           |          |           |
|-------|----|-----------|------------|-----------|----------|-----------|
| .25   | 3  | .482161   | .0088280   | .0050968  | .460231  | .504091   |
| Total | 18 | 20.619011 | 29.8911581 | 7.0454135 | 5.754488 | 35.483534 |

### Descriptives

concentration of E coli

|       | Minimum | Maximum |
|-------|---------|---------|
| .00   | 71.8226 | 77.5566 |
| .05   | 43.1835 | 47.7554 |
| .10   | 1.4251  | 1.5321  |
| .15   | 1.0122  | 1.2584  |
| .20   | .6147   | .7676   |
| .25   | .4771   | .4924   |
| Total | .4771   | 77.5566 |

### Test of Homogeneity of Variances

concentration of E coli

| Levene Statistic | df1 | df2 | Sig. |
|------------------|-----|-----|------|
| 6.186            | 5   | 12  | .005 |

### ANOVA

concentration of E coli

|                | Sum of Squares | df | Mean Square | F        | Sig. |
|----------------|----------------|----|-------------|----------|------|
| Between Groups | 15160.974      | 5  | 3032.195    | 1289.909 | .000 |
| Within Groups  | 28.208         | 12 | 2.351       |          |      |
| Total          | 15189.183      | 17 |             |          |      |

## Post Hoc Tests

### Multiple Comparisons

Dependent Variable: concentration of E coli

Bonferroni

| (I) CNCsAg | (J) CNCsAg | Mean<br>Difference (I-J) | Std. Error | Sig.  | 95% Confidence Interval |             |
|------------|------------|--------------------------|------------|-------|-------------------------|-------------|
|            |            |                          |            |       | Lower Bound             | Upper Bound |
| .00        | .05        | 28.6136595 <sup>*</sup>  | 1.2518532  | .000  | 24.045786               | 33.181533   |
|            | .10        | 72.7930683 <sup>*</sup>  | 1.2518532  | .000  | 68.225195               | 77.360942   |
|            | .15        | 73.1187564 <sup>*</sup>  | 1.2518532  | .000  | 68.550883               | 77.686630   |
|            | .20        | 73.5881753 <sup>*</sup>  | 1.2518532  | .000  | 69.020302               | 78.156049   |
|            | .25        | 73.7869521 <sup>*</sup>  | 1.2518532  | .000  | 69.219078               | 78.354826   |
| .05        | .00        | -28.6136595 <sup>*</sup> | 1.2518532  | .000  | -33.181533              | -24.045786  |
|            | .10        | 44.1794088 <sup>*</sup>  | 1.2518532  | .000  | 39.611535               | 48.747282   |
|            | .15        | 44.5050968 <sup>*</sup>  | 1.2518532  | .000  | 39.937223               | 49.072970   |
|            | .20        | 44.9745158 <sup>*</sup>  | 1.2518532  | .000  | 40.406642               | 49.542389   |
|            | .25        | 45.1732926 <sup>*</sup>  | 1.2518532  | .000  | 40.605419               | 49.741166   |
| .10        | .00        | -72.7930683 <sup>*</sup> | 1.2518532  | .000  | -77.360942              | -68.225195  |
|            | .05        | -44.1794088 <sup>*</sup> | 1.2518532  | .000  | -48.747282              | -39.611535  |
|            | .15        | .3256881                 | 1.2518532  | 1.000 | -4.242186               | 4.893562    |
|            | .20        | .7951070                 | 1.2518532  | 1.000 | -3.772767               | 5.362981    |
|            | .25        | .9938838                 | 1.2518532  | 1.000 | -3.573990               | 5.561757    |
| .15        | .00        | -73.1187564 <sup>*</sup> | 1.2518532  | .000  | -77.686630              | -68.550883  |
|            | .05        | -44.5050968 <sup>*</sup> | 1.2518532  | .000  | -49.072970              | -39.937223  |
|            | .10        | -.3256881                | 1.2518532  | 1.000 | -4.893562               | 4.242186    |
|            | .20        | .4694190                 | 1.2518532  | 1.000 | -4.098455               | 5.037293    |
|            | .25        | .6681957                 | 1.2518532  | 1.000 | -3.899678               | 5.236069    |
| .20        | .00        | -73.5881753 <sup>*</sup> | 1.2518532  | .000  | -78.156049              | -69.020302  |
|            | .05        | -44.9745158 <sup>*</sup> | 1.2518532  | .000  | -49.542389              | -40.406642  |
|            | .10        | -.7951070                | 1.2518532  | 1.000 | -5.362981               | 3.772767    |
|            | .15        | -.4694190                | 1.2518532  | 1.000 | -5.037293               | 4.098455    |
|            | .25        | .1987768                 | 1.2518532  | 1.000 | -4.369097               | 4.766650    |
| .25        | .00        | -73.7869521 <sup>*</sup> | 1.2518532  | .000  | -78.354826              | -69.219078  |
|            | .05        | -45.1732926 <sup>*</sup> | 1.2518532  | .000  | -49.741166              | -40.605419  |
|            | .10        | -.9938838                | 1.2518532  | 1.000 | -5.561757               | 3.573990    |
|            | .15        | -.6681957                | 1.2518532  | 1.000 | -5.236069               | 3.899678    |
|            | .20        | -.1987768                | 1.2518532  | 1.000 | -4.766650               | 4.369097    |

\*. The mean difference is significant at the 0.05 level.

## Means Plots

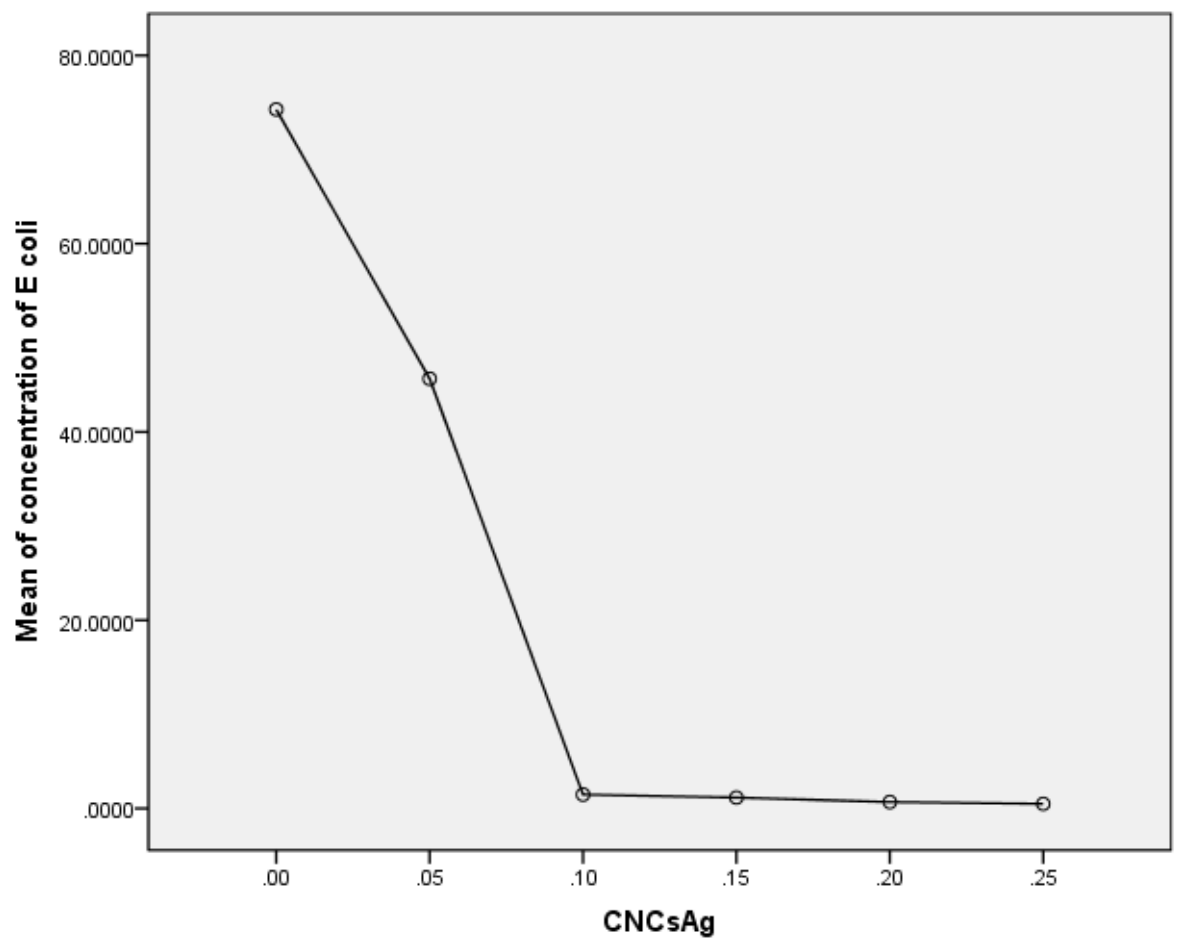



ONEWAY VAR00004 BY VAR00003  
 /STATISTICS DESCRIPTIVES HOMOGENEITY  
 /PLOT MEANS  
 /MISSING ANALYSIS  
 /POSTHOC=BONFERRONI ALPHA(0.05).

## Oneway

### Notes

|                        |                                                                                                                                             |                                                                                                        |
|------------------------|---------------------------------------------------------------------------------------------------------------------------------------------|--------------------------------------------------------------------------------------------------------|
| Output Created         | 22-NOV-2018 11:33:14                                                                                                                        |                                                                                                        |
| Comments               |                                                                                                                                             |                                                                                                        |
| Input                  | Data                                                                                                                                        | C:\Users\Beogene\Desktop\2.sav                                                                         |
|                        | Active Dataset                                                                                                                              |                                                                                                        |
|                        | Filter                                                                                                                                      | <none>                                                                                                 |
|                        | Weight                                                                                                                                      | <none>                                                                                                 |
|                        | Split File                                                                                                                                  | <none>                                                                                                 |
|                        | N of Rows in Working Data File                                                                                                              | 36                                                                                                     |
| Missing Value Handling | Definition of Missing                                                                                                                       | User-defined missing values are treated as missing.                                                    |
|                        | Cases Used                                                                                                                                  | Statistics for each analysis are based on cases with no missing data for any variable in the analysis. |
| Syntax                 | ONEWAY VAR00004 BY VAR00003<br>/STATISTICS DESCRIPTIVES HOMOGENEITY<br>/PLOT MEANS<br>/MISSING ANALYSIS<br>/POSTHOC=BONFERRONI ALPHA(0.05). |                                                                                                        |
| Resources              | Processor Time                                                                                                                              | 00:00:00.49                                                                                            |
|                        | Elapsed Time                                                                                                                                | 00:00:00.55                                                                                            |

### Descriptives

Rupture work

|       | N  | Mean        | Std. Deviation | Std. Error | 95% Confidence Interval for Mean |             |
|-------|----|-------------|----------------|------------|----------------------------------|-------------|
|       |    |             |                |            | Lower Bound                      | Upper Bound |
| .00   | 6  | 1370.191813 | 117.7550320    | 48.0732905 | 1246.615485                      | 1493.768140 |
| .05   | 6  | 2026.806413 | 229.1728882    | 93.5594398 | 1786.304217                      | 2267.308610 |
| .10   | 6  | 2367.098153 | 167.1699281    | 68.2468373 | 2191.664073                      | 2542.532234 |
| .15   | 6  | 1633.408545 | 236.8850186    | 96.7079039 | 1384.812964                      | 1882.004126 |
| .20   | 6  | 1538.102874 | 160.2182610    | 65.4088312 | 1369.964120                      | 1706.241627 |
| .25   | 6  | 1528.083469 | 183.7001310    | 74.9952644 | 1335.302004                      | 1720.864934 |
| Total | 36 | 1743.948544 | 389.3054669    | 64.8842445 | 1612.226525                      | 1875.670564 |

### Descriptives

Rupture work

|       | Minimum   | Maximum   |
|-------|-----------|-----------|
| .00   | 1232.6978 | 1549.6087 |
| .05   | 1807.2057 | 2329.8561 |
| .10   | 2066.3023 | 2524.2750 |
| .15   | 1331.5401 | 1913.1300 |
| .20   | 1367.6904 | 1826.6245 |
| .25   | 1308.2899 | 1780.6061 |
| Total | 1232.6978 | 2524.2750 |

### Test of Homogeneity of Variances

Rupture work

| Levene Statistic | df1 | df2 | Sig. |
|------------------|-----|-----|------|
| 1.205            | 5   | 30  | .331 |

### ANOVA

Rupture work

|                | Sum of Squares | df | Mean Square | F      | Sig. |
|----------------|----------------|----|-------------|--------|------|
| Between Groups | 4255244.196    | 5  | 851048.839  | 24.332 | .000 |
| Within Groups  | 1049311.932    | 30 | 34977.064   |        |      |
| Total          | 5304556.128    | 35 |             |        |      |

## Post Hoc Tests

### Multiple Comparisons

Dependent Variable: Rupture work

Bonferroni

| (I) CNCsAg | (J) CNCsAg | Mean<br>Difference (I-J)  | Std. Error  | Sig.  | 95%<br>Confidence<br>Interval |
|------------|------------|---------------------------|-------------|-------|-------------------------------|
|            |            |                           |             |       | Lower Bound                   |
| .00        | .05        | -656.6146005 <sup>*</sup> | 107.9769488 | .000  | -1000.932130                  |
|            | .10        | -996.9063407 <sup>*</sup> | 107.9769488 | .000  | -1341.223870                  |
|            | .15        | -263.2167320              | 107.9769488 | .314  | -607.534262                   |
|            | .20        | -167.9110610              | 107.9769488 | 1.000 | -512.228591                   |
|            | .25        | -157.8916563              | 107.9769488 | 1.000 | -502.209186                   |
| .05        | .00        | 656.6146005 <sup>*</sup>  | 107.9769488 | .000  | 312.297071                    |
|            | .10        | -340.2917402              | 107.9769488 | .055  | -684.609270                   |
|            | .15        | 393.3978685 <sup>*</sup>  | 107.9769488 | .015  | 49.080339                     |
|            | .20        | 488.7035395 <sup>*</sup>  | 107.9769488 | .001  | 144.386010                    |
|            | .25        | 498.7229442 <sup>*</sup>  | 107.9769488 | .001  | 154.405415                    |
| .10        | .00        | 996.9063407 <sup>*</sup>  | 107.9769488 | .000  | 652.588811                    |
|            | .05        | 340.2917402               | 107.9769488 | .055  | -4.025789                     |
|            | .15        | 733.6896087 <sup>*</sup>  | 107.9769488 | .000  | 389.372079                    |
|            | .20        | 828.9952797 <sup>*</sup>  | 107.9769488 | .000  | 484.677750                    |
|            | .25        | 839.0146843 <sup>*</sup>  | 107.9769488 | .000  | 494.697155                    |
| .15        | .00        | 263.2167320               | 107.9769488 | .314  | -81.100798                    |
|            | .05        | -393.3978685 <sup>*</sup> | 107.9769488 | .015  | -737.715398                   |
|            | .10        | -733.6896087 <sup>*</sup> | 107.9769488 | .000  | -1078.007138                  |
|            | .20        | 95.3056710                | 107.9769488 | 1.000 | -249.011859                   |
|            | .25        | 105.3250757               | 107.9769488 | 1.000 | -238.992454                   |
| .20        | .00        | 167.9110610               | 107.9769488 | 1.000 | -176.406469                   |
|            | .05        | -488.7035395 <sup>*</sup> | 107.9769488 | .001  | -833.021069                   |
|            | .10        | -828.9952797 <sup>*</sup> | 107.9769488 | .000  | -1173.312809                  |
|            | .15        | -95.3056710               | 107.9769488 | 1.000 | -439.623201                   |
|            | .25        | 10.0194047                | 107.9769488 | 1.000 | -334.298125                   |
| .25        | .00        | 157.8916563               | 107.9769488 | 1.000 | -186.425873                   |

|     |                           |             |       |              |
|-----|---------------------------|-------------|-------|--------------|
| .05 | -498.7229442 <sup>*</sup> | 107.9769488 | .001  | -843.040474  |
| .10 | -839.0146843 <sup>*</sup> | 107.9769488 | .000  | -1183.332214 |
| .15 | -105.3250757              | 107.9769488 | 1.000 | -449.642605  |
| .20 | -10.0194047               | 107.9769488 | 1.000 | -354.336934  |

### Multiple Comparisons

Dependent Variable: Rupture work

Bonferroni

|            |            | 95% Confidence Interval |
|------------|------------|-------------------------|
| (I) CNCsAg | (J) CNCsAg | Upper Bound             |
| .00        | .05        | -312.297071             |
|            | .10        | -652.588811             |
|            | .15        | 81.100798               |
|            | .20        | 176.406469              |
|            | .25        | 186.425873              |
| .05        | .00        | 1000.932130             |
|            | .10        | 4.025789                |
|            | .15        | 737.715398              |
|            | .20        | 833.021069              |
|            | .25        | 843.040474              |
| .10        | .00        | 1341.223870             |
|            | .05        | 684.609270              |
|            | .15        | 1078.007138             |
|            | .20        | 1173.312809             |
|            | .25        | 1183.332214             |
| .15        | .00        | 607.534262              |
|            | .05        | -49.080339              |
|            | .10        | -389.372079             |
|            | .20        | 439.623201              |
|            | .25        | 449.642605              |
| .20        | .00        | 512.228591              |
|            | .05        | -144.386010             |
|            | .10        | -484.677750             |
|            | .15        | 249.011859              |
|            | .25        | 354.336934              |
| .25        | .00        | 502.209186              |
|            | .05        | -154.405415             |
|            | .10        | -494.697155             |
|            | .15        | 238.992454              |
|            | .20        | 334.298125              |

\*. The mean difference is significant at the 0.05 level.

## Means Plots

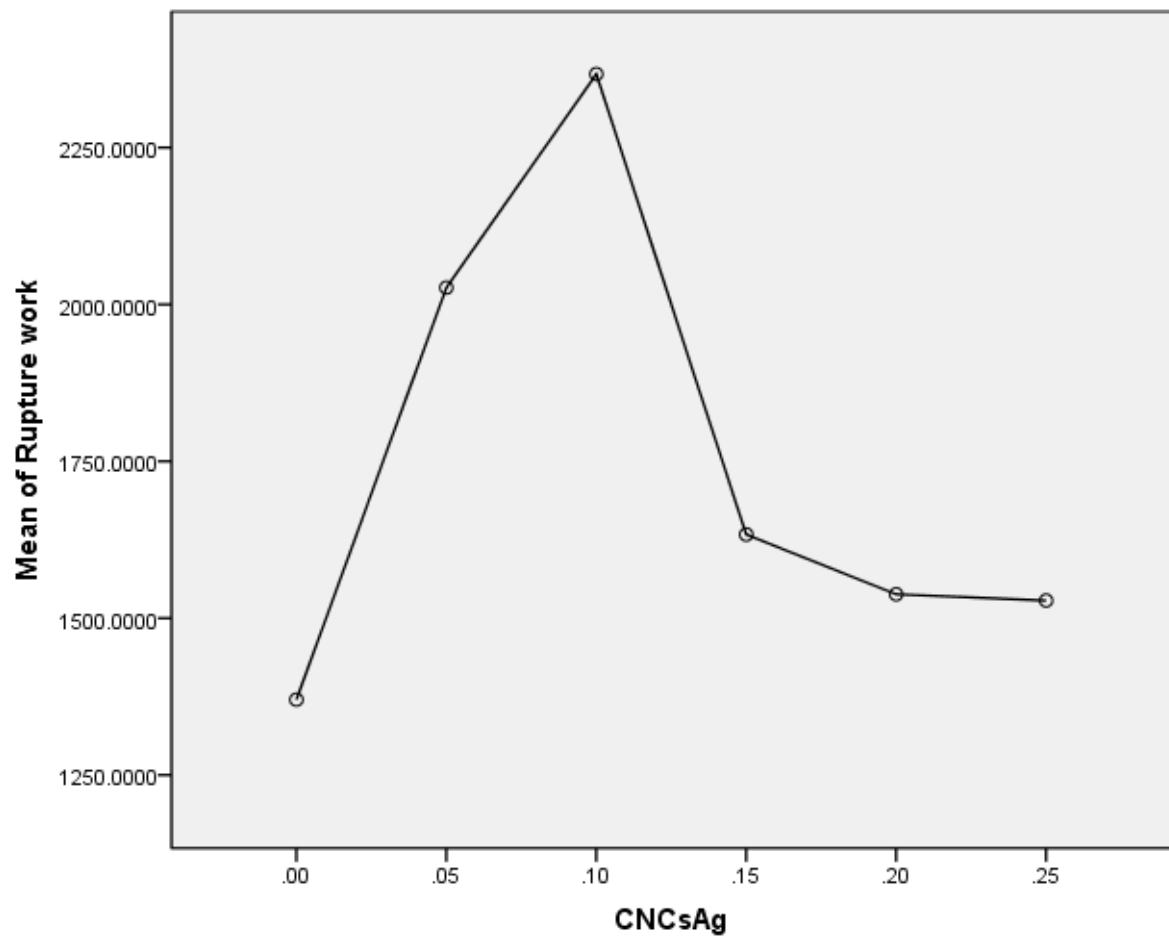

```
ONEWAY VAR00006 BY VAR00005  
  /STATISTICS DESCRIPTIVES HOMOGENEITY  
  /PLOT MEANS  
  /MISSING ANALYSIS  
  /POSTHOC=BONFERRONI ALPHA(0.05).
```

## Oneway

### Notes

|                        |                                                                                                                                                   |                                                                                                        |
|------------------------|---------------------------------------------------------------------------------------------------------------------------------------------------|--------------------------------------------------------------------------------------------------------|
| Output Created         | 22-NOV-2018 11:33:51                                                                                                                              |                                                                                                        |
| Comments               |                                                                                                                                                   |                                                                                                        |
| Input                  | Data                                                                                                                                              | C:\Users\Beogene\Desktop\2.sav                                                                         |
|                        | Active Dataset                                                                                                                                    |                                                                                                        |
|                        | Filter                                                                                                                                            | <none>                                                                                                 |
|                        | Weight                                                                                                                                            | <none>                                                                                                 |
|                        | Split File                                                                                                                                        | <none>                                                                                                 |
|                        | N of Rows in Working Data File                                                                                                                    | 36                                                                                                     |
| Missing Value Handling | Definition of Missing                                                                                                                             | User-defined missing values are treated as missing.                                                    |
|                        | Cases Used                                                                                                                                        | Statistics for each analysis are based on cases with no missing data for any variable in the analysis. |
| Syntax                 | ONEWAY VAR00006 BY VAR00005<br>/STATISTICS DESCRIPTIVES<br>HOMOGENEITY<br>/PLOT MEANS<br>/MISSING ANALYSIS<br>/POSTHOC=BONFERRONI<br>ALPHA(0.05). |                                                                                                        |
| Resources              | Processor Time                                                                                                                                    | 00:00:00.64                                                                                            |
|                        | Elapsed Time                                                                                                                                      | 00:00:00.76                                                                                            |

### Descriptives

Flexural strength

|     | N | Mean    | Std. Deviation | Std. Error | 95% Confidence Interval for Mean |             |
|-----|---|---------|----------------|------------|----------------------------------|-------------|
|     |   |         |                |            | Lower Bound                      | Upper Bound |
| .00 | 5 | 70.0879 | 3.27879        | 1.46632    | 66.0168                          | 74.1591     |
| .05 | 5 | 74.2587 | 2.79423        | 1.24962    | 70.7892                          | 77.7281     |

|       |    |         |         |         |         |         |
|-------|----|---------|---------|---------|---------|---------|
| .10   | 5  | 78.3980 | 6.87760 | 3.07576 | 69.8583 | 86.9376 |
| .15   | 5  | 70.0516 | 6.78503 | 3.03436 | 61.6269 | 78.4763 |
| .20   | 5  | 70.0499 | 5.82054 | 2.60303 | 62.8227 | 77.2770 |
| .25   | 5  | 65.0099 | 3.99535 | 1.78677 | 60.0490 | 69.9708 |
| Total | 30 | 71.3093 | 6.33382 | 1.15639 | 68.9442 | 73.6744 |

### Descriptives

Flexural strength

|       | Minimum | Maximum |
|-------|---------|---------|
| .00   | 65.01   | 73.57   |
| .05   | 71.45   | 78.84   |
| .10   | 70.95   | 87.42   |
| .15   | 61.26   | 77.46   |
| .20   | 62.09   | 76.10   |
| .25   | 60.32   | 68.48   |
| Total | 60.32   | 87.42   |

### Test of Homogeneity of Variances

Flexural strength

| Levene Statistic | df1 | df2 | Sig. |
|------------------|-----|-----|------|
| 2.338            | 5   | 24  | .073 |

### ANOVA

Flexural strength

|                | Sum of Squares | df | Mean Square | F     | Sig. |
|----------------|----------------|----|-------------|-------|------|
| Between Groups | 516.451        | 5  | 103.290     | 3.832 | .011 |
| Within Groups  | 646.951        | 24 | 26.956      |       |      |
| Total          | 1163.402       | 29 |             |       |      |

## Post Hoc Tests

### Multiple Comparisons

Dependent Variable: Flexural strength

Bonferroni

| (I) CNCsAg | (J) CNCsAg | Mean<br>Difference (I-J) | Std. Error | Sig.  | 95% Confidence Interval |             |
|------------|------------|--------------------------|------------|-------|-------------------------|-------------|
|            |            |                          |            |       | Lower Bound             | Upper Bound |
| .00        | .05        | -4.17072                 | 3.28367    | 1.000 | -14.8702                | 6.5287      |
|            | .10        | -8.31002                 | 3.28367    | .275  | -19.0095                | 2.3894      |
|            | .15        | .03632                   | 3.28367    | 1.000 | -10.6631                | 10.7358     |
|            | .20        | .03806                   | 3.28367    | 1.000 | -10.6614                | 10.7375     |
|            | .25        | 5.07806                  | 3.28367    | 1.000 | -5.6214                 | 15.7775     |
| .05        | .00        | 4.17072                  | 3.28367    | 1.000 | -6.5287                 | 14.8702     |
|            | .10        | -4.13930                 | 3.28367    | 1.000 | -14.8388                | 6.5602      |
|            | .15        | 4.20704                  | 3.28367    | 1.000 | -6.4924                 | 14.9065     |
|            | .20        | 4.20878                  | 3.28367    | 1.000 | -6.4907                 | 14.9082     |
|            | .25        | 9.24878                  | 3.28367    | .143  | -1.4507                 | 19.9482     |
| .10        | .00        | 8.31002                  | 3.28367    | .275  | -2.3894                 | 19.0095     |
|            | .05        | 4.13930                  | 3.28367    | 1.000 | -6.5602                 | 14.8388     |
|            | .15        | 8.34634                  | 3.28367    | .269  | -2.3531                 | 19.0458     |
|            | .20        | 8.34808                  | 3.28367    | .268  | -2.3514                 | 19.0475     |
|            | .25        | 13.38808*                | 3.28367    | .007  | 2.6886                  | 24.0875     |
| .15        | .00        | -.03632                  | 3.28367    | 1.000 | -10.7358                | 10.6631     |
|            | .05        | -4.20704                 | 3.28367    | 1.000 | -14.9065                | 6.4924      |
|            | .10        | -8.34634                 | 3.28367    | .269  | -19.0458                | 2.3531      |
|            | .20        | .00174                   | 3.28367    | 1.000 | -10.6977                | 10.7012     |
|            | .25        | 5.04174                  | 3.28367    | 1.000 | -5.6577                 | 15.7412     |
| .20        | .00        | -.03806                  | 3.28367    | 1.000 | -10.7375                | 10.6614     |
|            | .05        | -4.20878                 | 3.28367    | 1.000 | -14.9082                | 6.4907      |
|            | .10        | -8.34808                 | 3.28367    | .268  | -19.0475                | 2.3514      |
|            | .15        | -.00174                  | 3.28367    | 1.000 | -10.7012                | 10.6977     |
|            | .25        | 5.04000                  | 3.28367    | 1.000 | -5.6595                 | 15.7395     |
| .25        | .00        | -5.07806                 | 3.28367    | 1.000 | -15.7775                | 5.6214      |
|            | .05        | -9.24878                 | 3.28367    | .143  | -19.9482                | 1.4507      |
|            | .10        | -13.38808*               | 3.28367    | .007  | -24.0875                | -2.6886     |
|            | .15        | -5.04174                 | 3.28367    | 1.000 | -15.7412                | 5.6577      |
|            | .20        | -5.04000                 | 3.28367    | 1.000 | -15.7395                | 5.6595      |

\*. The mean difference is significant at the 0.05 level.



## Means Plots

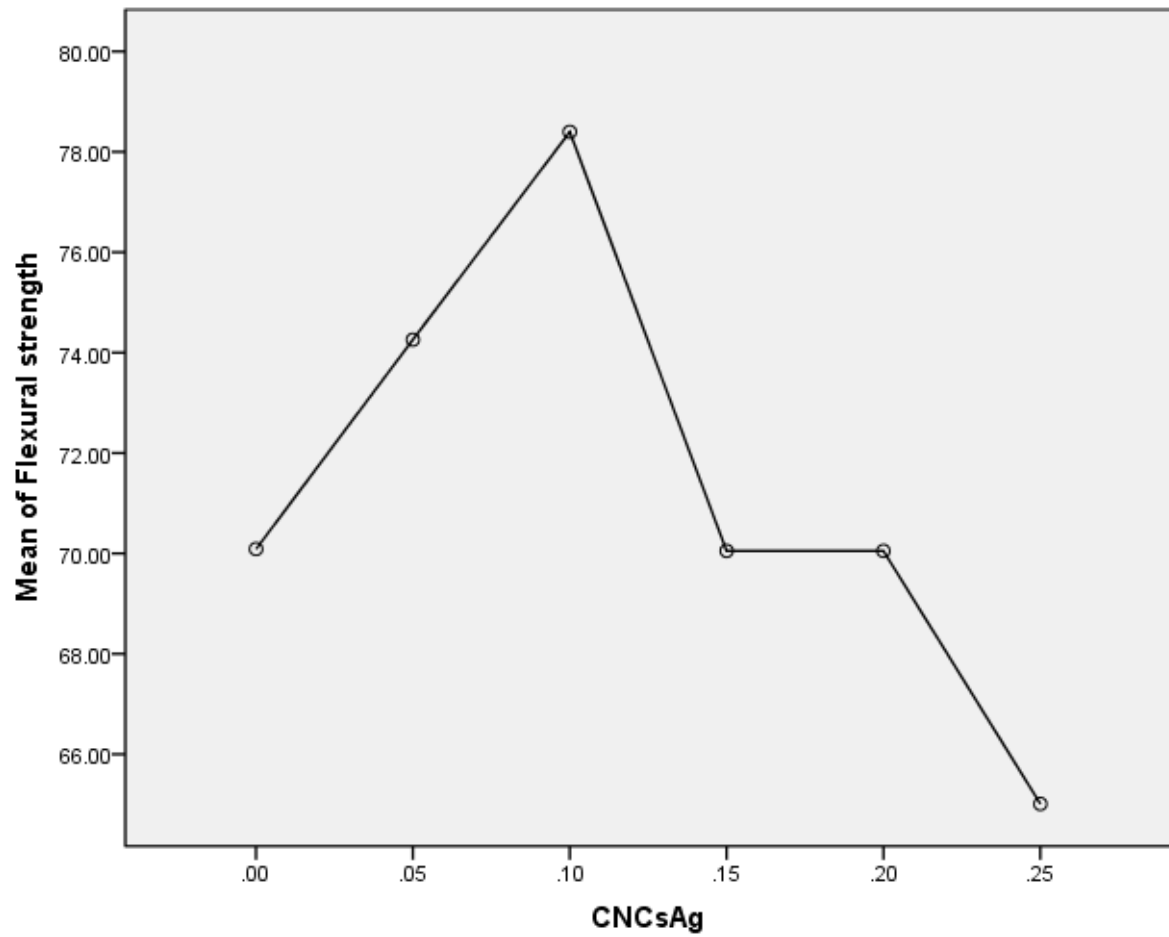

```
ONEWAY VAR00007 BY VAR00005  
  /STATISTICS DESCRIPTIVES HOMOGENEITY  
  /PLOT MEANS  
  /MISSING ANALYSIS  
  /POSTHOC=BONFERRONI ALPHA(0.05).
```

## Oneway

### Notes

|                        |                                                                                                                                                   |                                                                                                        |
|------------------------|---------------------------------------------------------------------------------------------------------------------------------------------------|--------------------------------------------------------------------------------------------------------|
| Output Created         | 22-NOV-2018 11:35:01                                                                                                                              |                                                                                                        |
| Comments               |                                                                                                                                                   |                                                                                                        |
| Input                  | Data                                                                                                                                              | C:\Users\Beogene\Desktop\2.sav                                                                         |
|                        | Active Dataset                                                                                                                                    |                                                                                                        |
|                        | Filter                                                                                                                                            | <none>                                                                                                 |
|                        | Weight                                                                                                                                            | <none>                                                                                                 |
|                        | Split File                                                                                                                                        | <none>                                                                                                 |
|                        | N of Rows in Working Data File                                                                                                                    | 36                                                                                                     |
| Missing Value Handling | Definition of Missing                                                                                                                             | User-defined missing values are treated as missing.                                                    |
|                        | Cases Used                                                                                                                                        | Statistics for each analysis are based on cases with no missing data for any variable in the analysis. |
| Syntax                 | ONEWAY VAR00007 BY VAR00005<br>/STATISTICS DESCRIPTIVES<br>HOMOGENEITY<br>/PLOT MEANS<br>/MISSING ANALYSIS<br>/POSTHOC=BONFERRONI<br>ALPHA(0.05). |                                                                                                        |
| Resources              | Processor Time                                                                                                                                    | 00:00:00.53                                                                                            |
|                        | Elapsed Time                                                                                                                                      | 00:00:00.51                                                                                            |

### Descriptives

Flexural modulus

|       | N  | Mean      | Std. Deviation | Std. Error | 95% Confidence Interval for Mean |             |
|-------|----|-----------|----------------|------------|----------------------------------|-------------|
|       |    |           |                |            | Lower Bound                      | Upper Bound |
| .00   | 5  | 2171.8740 | 234.86084      | 105.03296  | 1880.2558                        | 2463.4922   |
| .05   | 5  | 2136.1600 | 88.43433       | 39.54904   | 2026.3543                        | 2245.9657   |
| .10   | 5  | 2295.0880 | 196.29850      | 87.78736   | 2051.3512                        | 2538.8248   |
| .15   | 5  | 2342.5120 | 55.19920       | 24.68583   | 2273.9731                        | 2411.0509   |
| .20   | 5  | 2364.0940 | 86.59940       | 38.72843   | 2256.5666                        | 2471.6214   |
| .25   | 5  | 2235.6200 | 102.79863      | 45.97295   | 2107.9786                        | 2363.2614   |
| Total | 30 | 2257.5580 | 155.71744      | 28.42999   | 2199.4122                        | 2315.7038   |

### Descriptives

Flexural modulus

|       | Minimum | Maximum |
|-------|---------|---------|
| .00   | 1959.84 | 2495.73 |
| .05   | 2071.93 | 2290.41 |
| .10   | 2079.66 | 2606.21 |
| .15   | 2282.96 | 2410.38 |
| .20   | 2283.65 | 2499.39 |
| .25   | 2125.26 | 2359.20 |
| Total | 1959.84 | 2606.21 |

### Test of Homogeneity of Variances

Flexural modulus

| Levene Statistic | df1 | df2 | Sig. |
|------------------|-----|-----|------|
| 3.649            | 5   | 24  | .013 |

### ANOVA

Flexural modulus

|                | Sum of Squares | df | Mean Square | F     | Sig. |
|----------------|----------------|----|-------------|-------|------|
| Between Groups | 212680.502     | 5  | 42536.100   | 2.081 | .103 |
| Within Groups  | 490509.254     | 24 | 20437.886   |       |      |
| Total          | 703189.756     | 29 |             |       |      |

## Post Hoc Tests

### Multiple Comparisons

Dependent Variable: Flexural modulus

Bonferroni

| (I) CNCsAg | (J) CNCsAg | Mean<br>Difference (I-J) | Std. Error | Sig.  | 95% Confidence Interval |             |
|------------|------------|--------------------------|------------|-------|-------------------------|-------------|
|            |            |                          |            |       | Lower Bound             | Upper Bound |
| .00        | .05        | 35.71400                 | 90.41656   | 1.000 | -258.8977               | 330.3257    |

|     |     |            |          |       |           |          |
|-----|-----|------------|----------|-------|-----------|----------|
|     | .10 | -123.21400 | 90.41656 | 1.000 | -417.8257 | 171.3977 |
|     | .15 | -170.63800 | 90.41656 | 1.000 | -465.2497 | 123.9737 |
|     | .20 | -192.22000 | 90.41656 | .660  | -486.8317 | 102.3917 |
|     | .25 | -63.74600  | 90.41656 | 1.000 | -358.3577 | 230.8657 |
| .05 | .00 | -35.71400  | 90.41656 | 1.000 | -330.3257 | 258.8977 |
|     | .10 | -158.92800 | 90.41656 | 1.000 | -453.5397 | 135.6837 |
|     | .15 | -206.35200 | 90.41656 | .474  | -500.9637 | 88.2597  |
|     | .20 | -227.93400 | 90.41656 | .281  | -522.5457 | 66.6777  |
|     | .25 | -99.46000  | 90.41656 | 1.000 | -394.0717 | 195.1517 |
| .10 | .00 | 123.21400  | 90.41656 | 1.000 | -171.3977 | 417.8257 |
|     | .05 | 158.92800  | 90.41656 | 1.000 | -135.6837 | 453.5397 |
|     | .15 | -47.42400  | 90.41656 | 1.000 | -342.0357 | 247.1877 |
|     | .20 | -69.00600  | 90.41656 | 1.000 | -363.6177 | 225.6057 |
|     | .25 | 59.46800   | 90.41656 | 1.000 | -235.1437 | 354.0797 |
| .15 | .00 | 170.63800  | 90.41656 | 1.000 | -123.9737 | 465.2497 |
|     | .05 | 206.35200  | 90.41656 | .474  | -88.2597  | 500.9637 |
|     | .10 | 47.42400   | 90.41656 | 1.000 | -247.1877 | 342.0357 |
|     | .20 | -21.58200  | 90.41656 | 1.000 | -316.1937 | 273.0297 |
|     | .25 | 106.89200  | 90.41656 | 1.000 | -187.7197 | 401.5037 |
| .20 | .00 | 192.22000  | 90.41656 | .660  | -102.3917 | 486.8317 |
|     | .05 | 227.93400  | 90.41656 | .281  | -66.6777  | 522.5457 |
|     | .10 | 69.00600   | 90.41656 | 1.000 | -225.6057 | 363.6177 |
|     | .15 | 21.58200   | 90.41656 | 1.000 | -273.0297 | 316.1937 |
|     | .25 | 128.47400  | 90.41656 | 1.000 | -166.1377 | 423.0857 |
| .25 | .00 | 63.74600   | 90.41656 | 1.000 | -230.8657 | 358.3577 |
|     | .05 | 99.46000   | 90.41656 | 1.000 | -195.1517 | 394.0717 |
|     | .10 | -59.46800  | 90.41656 | 1.000 | -354.0797 | 235.1437 |
|     | .15 | -106.89200 | 90.41656 | 1.000 | -401.5037 | 187.7197 |
|     | .20 | -128.47400 | 90.41656 | 1.000 | -423.0857 | 166.1377 |

## Means Plots

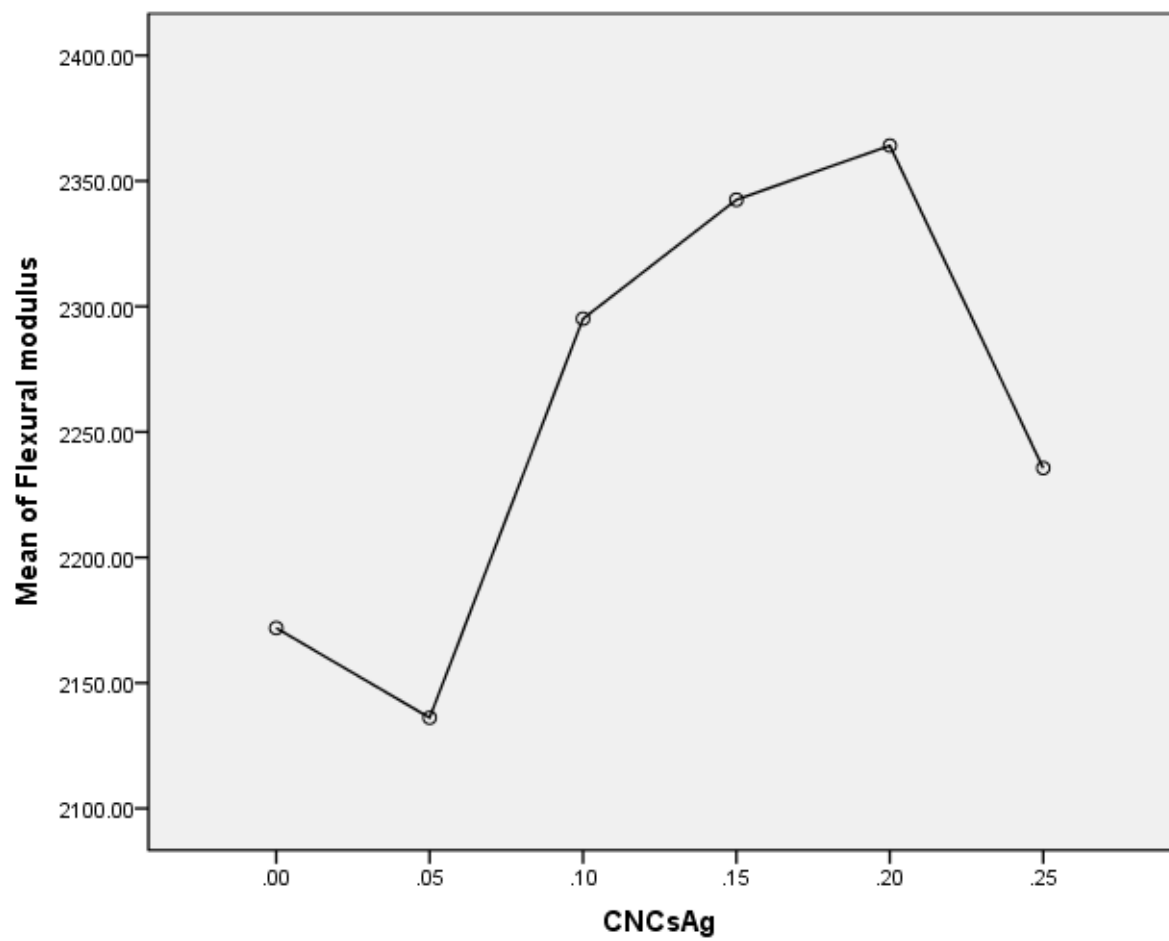

Supplement: s1 [file s1]
