# Supplementary material for: A Study of 3D-Printable Reinforced Composite Resin: PMMA Modified with Silver Nanoparticles Loaded Cellulose Nanocrystal
Source: MDPI journal article supplement (doi:10.3390/ma11122444), 2018-12-03

ONEWAY survivalrateD1 BY CNCsAg  
 /STATISTICS DESCRIPTIVES HOMOGENEITY  
 /PLOT MEANS  
 /MISSING ANALYSIS  
 /POSTHOC=BONFERRONI ALPHA(0.05).

## Oneway

### Descriptives

survivalrateD1

|       | N  | Mean   | Std. Deviation | Std. Error | 95% Confidence Interval for Mean |             |
|-------|----|--------|----------------|------------|----------------------------------|-------------|
|       |    |        |                |            | Lower Bound                      | Upper Bound |
| .00   | 3  | .9984  | .06370         | .03678     | .8401                            | 1.1566      |
| .02   | 3  | 1.0413 | .04777         | .02758     | .9227                            | 1.1600      |
| .05   | 3  | 1.0003 | .11638         | .06719     | .7112                            | 1.2894      |
| .10   | 3  | 1.0587 | .07180         | .04145     | .8803                            | 1.2371      |
| .15   | 3  | 1.0404 | .06606         | .03814     | .8763                            | 1.2045      |
| .25   | 3  | 1.0262 | .03980         | .02298     | .9273                            | 1.1251      |
| Total | 18 | 1.0276 | .06450         | .01520     | .9955                            | 1.0596      |

### Descriptives

survivalrateD1

|       | Minimum | Maximum |
|-------|---------|---------|
| .00   | .95     | 1.07    |
| .02   | .99     | 1.09    |
| .05   | .92     | 1.13    |
| .10   | .99     | 1.14    |
| .15   | .97     | 1.11    |
| .25   | .98     | 1.06    |
| Total | .92     | 1.14    |

### Test of Homogeneity of Variances

survivalrateD1

| Levene Statistic | df1 | df2 | Sig. |
|------------------|-----|-----|------|
| 1.393            | 5   | 12  | .294 |

ANOVA

survivalrateD1

|                | Sum of Squares | df | Mean Square | F    | Sig. |
|----------------|----------------|----|-------------|------|------|
| Between Groups | .009           | 5  | .002        | .339 | .879 |
| Within Groups  | .062           | 12 | .005        |      |      |
| Total          | .071           | 17 |             |      |      |

## Post Hoc Tests

### Multiple Comparisons

Dependent Variable: survivalrateD1

Bonferroni

| (I) CNCsAg | (J) CNCsAg | Mean<br>Difference (I-J) | Std. Error | Sig.  | 95% Confidence Interval |             |
|------------|------------|--------------------------|------------|-------|-------------------------|-------------|
|            |            |                          |            |       | Lower Bound             | Upper Bound |
| .00        | .02        | -.04297                  | .05868     | 1.000 | -.2571                  | .1711       |
|            | .05        | -.00196                  | .05868     | 1.000 | -.2161                  | .2121       |
|            | .10        | -.06033                  | .05868     | 1.000 | -.2744                  | .1538       |
|            | .15        | -.04207                  | .05868     | 1.000 | -.2562                  | .1720       |
|            | .25        | -.02783                  | .05868     | 1.000 | -.2419                  | .1863       |
| .02        | .00        | .04297                   | .05868     | 1.000 | -.1711                  | .2571       |
|            | .05        | .04101                   | .05868     | 1.000 | -.1731                  | .2551       |
|            | .10        | -.01736                  | .05868     | 1.000 | -.2315                  | .1967       |
|            | .15        | .00090                   | .05868     | 1.000 | -.2132                  | .2150       |
|            | .25        | .01513                   | .05868     | 1.000 | -.1990                  | .2292       |
| .05        | .00        | .00196                   | .05868     | 1.000 | -.2121                  | .2161       |
|            | .02        | -.04101                  | .05868     | 1.000 | -.2551                  | .1731       |
|            | .10        | -.05837                  | .05868     | 1.000 | -.2725                  | .1557       |
|            | .15        | -.04011                  | .05868     | 1.000 | -.2542                  | .1740       |
|            | .25        | -.02588                  | .05868     | 1.000 | -.2400                  | .1882       |
| .10        | .00        | .06033                   | .05868     | 1.000 | -.1538                  | .2744       |
|            | .02        | .01736                   | .05868     | 1.000 | -.1967                  | .2315       |

|     |     |         |        |       |        |       |
|-----|-----|---------|--------|-------|--------|-------|
|     | .05 | .05837  | .05868 | 1.000 | -.1557 | .2725 |
|     | .15 | .01826  | .05868 | 1.000 | -.1958 | .2324 |
|     | .25 | .03249  | .05868 | 1.000 | -.1816 | .2466 |
| .15 | .00 | .04207  | .05868 | 1.000 | -.1720 | .2562 |
|     | .02 | -.00090 | .05868 | 1.000 | -.2150 | .2132 |
|     | .05 | .04011  | .05868 | 1.000 | -.1740 | .2542 |
|     | .10 | -.01826 | .05868 | 1.000 | -.2324 | .1958 |
|     | .25 | .01424  | .05868 | 1.000 | -.1999 | .2283 |
| .25 | .00 | .02783  | .05868 | 1.000 | -.1863 | .2419 |
|     | .02 | -.01513 | .05868 | 1.000 | -.2292 | .1990 |
|     | .05 | .02588  | .05868 | 1.000 | -.1882 | .2400 |
|     | .10 | -.03249 | .05868 | 1.000 | -.2466 | .1816 |
|     | .15 | -.01424 | .05868 | 1.000 | -.2283 | .1999 |

## Means Plots

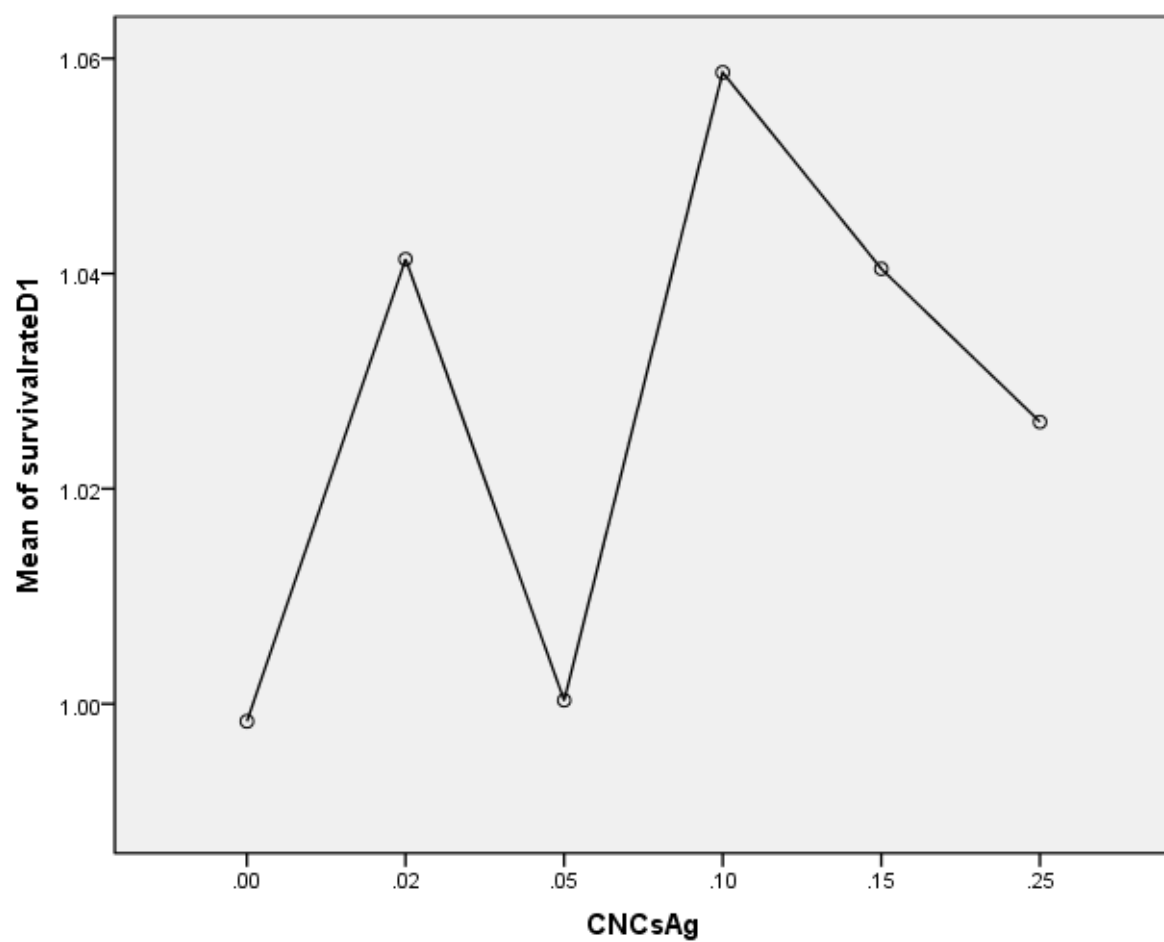

ONEWAY survivalrateD3 BY CNCsAg  
 /STATISTICS DESCRIPTIVES HOMOGENEITY  
 /PLOT MEANS  
 /MISSING ANALYSIS  
 /POSTHOC=BONFERRONI ALPHA(0.05).

## Oneway

### Descriptives

survivalrateD3

|       | N  | Mean  | Std. Deviation | Std. Error | 95% Confidence Interval for Mean |             |
|-------|----|-------|----------------|------------|----------------------------------|-------------|
|       |    |       |                |            | Lower Bound                      | Upper Bound |
| .00   | 3  | .9936 | .07600         | .04388     | .8048                            | 1.1824      |
| .02   | 3  | .9398 | .07557         | .04363     | .7520                            | 1.1275      |
| .05   | 3  | .9433 | .04074         | .02352     | .8421                            | 1.0446      |
| .10   | 3  | .9843 | .01872         | .01081     | .9378                            | 1.0308      |
| .15   | 3  | .9753 | .08736         | .05044     | .7583                            | 1.1923      |
| .25   | 3  | .8985 | .01445         | .00834     | .8626                            | .9344       |
| Total | 18 | .9558 | .06021         | .01419     | .9259                            | .9857       |

### Descriptives

survivalrateD3

|       | Minimum | Maximum |
|-------|---------|---------|
| .00   | .92     | 1.07    |
| .02   | .89     | 1.03    |
| .05   | .90     | .98     |
| .10   | .96     | 1.00    |
| .15   | .90     | 1.07    |
| .25   | .88     | .91     |
| Total | .88     | 1.07    |

### Test of Homogeneity of Variances

survivalrateD3

| Levene Statistic | df1 | df2 | Sig. |
|------------------|-----|-----|------|
| 1.945            | 5   | 12  | .160 |

## ANOVA

survivalrateD3

|                | Sum of Squares | df | Mean Square | F     | Sig. |
|----------------|----------------|----|-------------|-------|------|
| Between Groups | .019           | 5  | .004        | 1.066 | .426 |
| Within Groups  | .043           | 12 | .004        |       |      |
| Total          | .062           | 17 |             |       |      |

## Post Hoc Tests

### Multiple Comparisons

Dependent Variable: survivalrateD3

Bonferroni

| (I) CNCsAg | (J) CNCsAg | Mean Difference (I-J) | Std. Error | Sig.  | 95% Confidence Interval |             |
|------------|------------|-----------------------|------------|-------|-------------------------|-------------|
|            |            |                       |            |       | Lower Bound             | Upper Bound |
| .00        | .02        | .05380                | .04869     | 1.000 | -.1239                  | .2315       |
|            | .05        | .05022                | .04869     | 1.000 | -.1274                  | .2279       |
|            | .10        | .00921                | .04869     | 1.000 | -.1685                  | .1869       |
|            | .15        | .01824                | .04869     | 1.000 | -.1594                  | .1959       |
|            | .25        | .09507                | .04869     | 1.000 | -.0826                  | .2727       |
| .02        | .00        | -.05380               | .04869     | 1.000 | -.2315                  | .1239       |
|            | .05        | -.00358               | .04869     | 1.000 | -.1812                  | .1741       |
|            | .10        | -.04459               | .04869     | 1.000 | -.2223                  | .1331       |
|            | .15        | -.03555               | .04869     | 1.000 | -.2132                  | .1421       |
|            | .25        | .04127                | .04869     | 1.000 | -.1364                  | .2189       |
| .05        | .00        | -.05022               | .04869     | 1.000 | -.2279                  | .1274       |
|            | .02        | .00358                | .04869     | 1.000 | -.1741                  | .1812       |
|            | .10        | -.04101               | .04869     | 1.000 | -.2187                  | .1367       |
|            | .15        | -.03197               | .04869     | 1.000 | -.2096                  | .1457       |
|            | .25        | .04485                | .04869     | 1.000 | -.1328                  | .2225       |
| .10        | .00        | -.00921               | .04869     | 1.000 | -.1869                  | .1685       |
|            | .02        | .04459                | .04869     | 1.000 | -.1331                  | .2223       |
|            | .05        | .04101                | .04869     | 1.000 | -.1367                  | .2187       |
|            | .15        | .00904                | .04869     | 1.000 | -.1686                  | .1867       |
|            | .25        | .08586                | .04869     | 1.000 | -.0918                  | .2635       |
| .15        | .00        | -.01824               | .04869     | 1.000 | -.1959                  | .1594       |
|            | .02        | .03555                | .04869     | 1.000 | -.1421                  | .2132       |

|     |     |  |         |        |       |        |       |
|-----|-----|--|---------|--------|-------|--------|-------|
|     | .05 |  | .03197  | .04869 | 1.000 | -.1457 | .2096 |
|     | .10 |  | -.00904 | .04869 | 1.000 | -.1867 | .1686 |
|     | .25 |  | .07682  | .04869 | 1.000 | -.1008 | .2545 |
| .25 | .00 |  | -.09507 | .04869 | 1.000 | -.2727 | .0826 |
|     | .02 |  | -.04127 | .04869 | 1.000 | -.2189 | .1364 |
|     | .05 |  | -.04485 | .04869 | 1.000 | -.2225 | .1328 |
|     | .10 |  | -.08586 | .04869 | 1.000 | -.2635 | .0918 |
|     | .15 |  | -.07682 | .04869 | 1.000 | -.2545 | .1008 |

## Means Plots

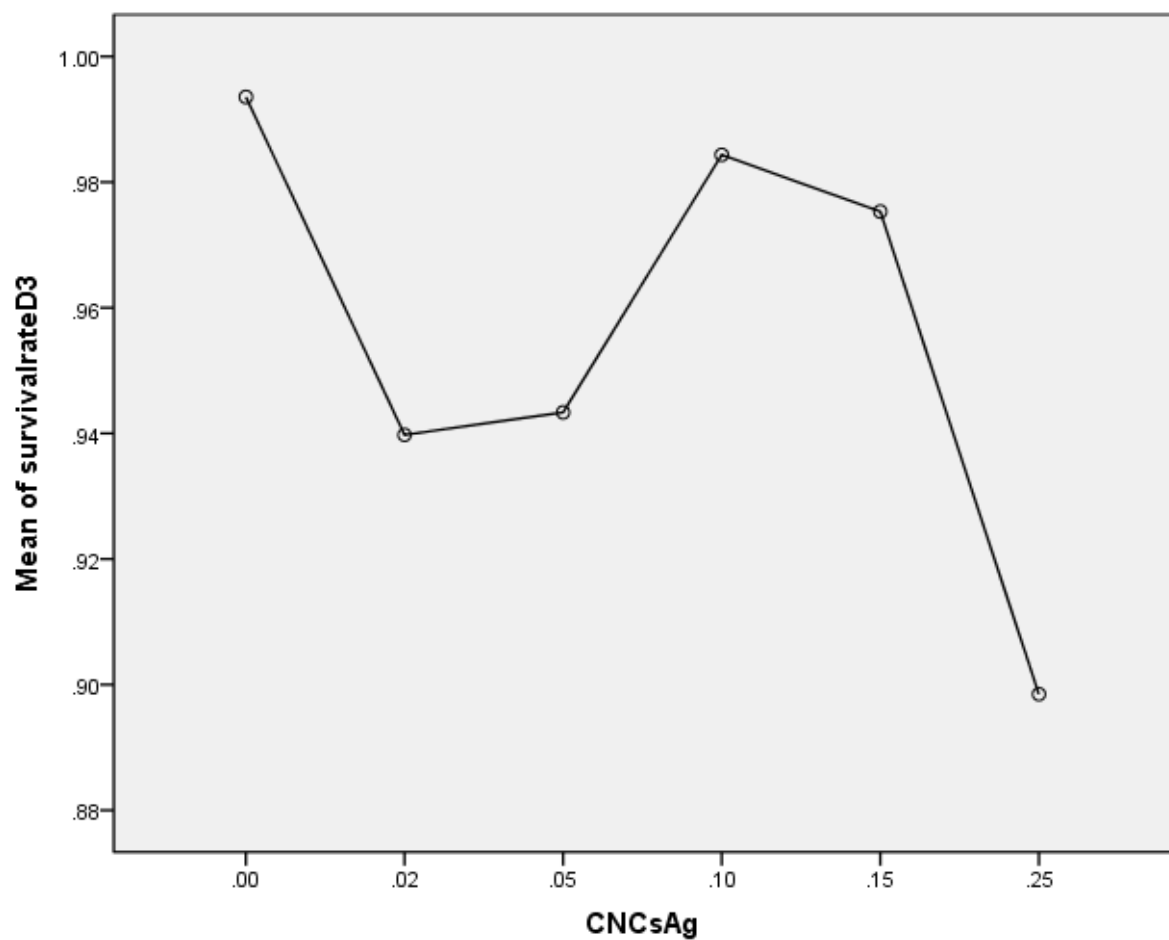



ONEWAY survivalrateD5 BY CNCsAg  
 /STATISTICS DESCRIPTIVES HOMOGENEITY  
 /PLOT MEANS  
 /MISSING ANALYSIS  
 /POSTHOC=BONFERRONI ALPHA(0.05).

## Oneway

### Descriptives

survivalrateD5

|       | N  | Mean   | Std. Deviation | Std. Error | 95% Confidence Interval for Mean |             |
|-------|----|--------|----------------|------------|----------------------------------|-------------|
|       |    |        |                |            | Lower Bound                      | Upper Bound |
| .00   | 3  | .9916  | .04304         | .02485     | .8847                            | 1.0985      |
| .02   | 3  | .9652  | .11431         | .06600     | .6813                            | 1.2492      |
| .05   | 3  | 1.0347 | .04181         | .02414     | .9308                            | 1.1386      |
| .10   | 3  | .9204  | .04147         | .02394     | .8174                            | 1.0234      |
| .15   | 3  | .9384  | .04376         | .02527     | .8297                            | 1.0472      |
| .25   | 3  | .9309  | .01694         | .00978     | .8888                            | .9730       |
| Total | 18 | .9636  | .06390         | .01506     | .9318                            | .9953       |

### Descriptives

survivalrateD5

|     | Minimum | Maximum |
|-----|---------|---------|
| .00 | .95     | 1.03    |

|       |      |      |
|-------|------|------|
| .02   | .86  | 1.09 |
| .05   | 1.00 | 1.08 |
| .10   | .87  | .95  |
| .15   | .91  | .99  |
| .25   | .91  | .94  |
| Total | .86  | 1.09 |

### Test of Homogeneity of Variances

survivalrateD5

| Levene Statistic | df1 | df2 | Sig. |
|------------------|-----|-----|------|
| 2.056            | 5   | 12  | .142 |

### ANOVA

survivalrateD5

|                | Sum of Squares | df | Mean Square | F     | Sig. |
|----------------|----------------|----|-------------|-------|------|
| Between Groups | .028           | 5  | .006        | 1.645 | .222 |
| Within Groups  | .041           | 12 | .003        |       |      |
| Total          | .069           | 17 |             |       |      |

### Post Hoc Tests

### Multiple Comparisons

Dependent Variable: survivalrateD5

Bonferroni

| (I) CNCsAg | (J) CNCsAg | Mean Difference (I-J) | Std. Error | Sig.  | 95% Confidence Interval |             |
|------------|------------|-----------------------|------------|-------|-------------------------|-------------|
|            |            |                       |            |       | Lower Bound             | Upper Bound |
| .00        | .02        | .02639                | .04783     | 1.000 | -.1481                  | .2009       |
|            | .05        | -.04309               | .04783     | 1.000 | -.2176                  | .1314       |
|            | .10        | .07119                | .04783     | 1.000 | -.1033                  | .2457       |
|            | .15        | .05318                | .04783     | 1.000 | -.1213                  | .2277       |
|            | .25        | .06072                | .04783     | 1.000 | -.1138                  | .2352       |
| .02        | .00        | -.02639               | .04783     | 1.000 | -.2009                  | .1481       |
|            | .05        | -.06948               | .04783     | 1.000 | -.2440                  | .1050       |
|            | .10        | .04480                | .04783     | 1.000 | -.1297                  | .2193       |
|            | .15        | .02678                | .04783     | 1.000 | -.1477                  | .2013       |
|            | .25        | .03433                | .04783     | 1.000 | -.1402                  | .2089       |
| .05        | .00        | .04309                | .04783     | 1.000 | -.1314                  | .2176       |
|            | .02        | .06948                | .04783     | 1.000 | -.1050                  | .2440       |
|            | .10        | .11428                | .04783     | .513  | -.0602                  | .2888       |
|            | .15        | .09626                | .04783     | 1.000 | -.0783                  | .2708       |

|     |     |         |        |       |        |       |
|-----|-----|---------|--------|-------|--------|-------|
|     | .25 | .10381  | .04783 | .761  | -.0707 | .2783 |
| .10 | .00 | -.07119 | .04783 | 1.000 | -.2457 | .1033 |
|     | .02 | -.04480 | .04783 | 1.000 | -.2193 | .1297 |
|     | .05 | -.11428 | .04783 | .513  | -.2888 | .0602 |
|     | .15 | -.01802 | .04783 | 1.000 | -.1925 | .1565 |
|     | .25 | -.01047 | .04783 | 1.000 | -.1850 | .1641 |
| .15 | .00 | -.05318 | .04783 | 1.000 | -.2277 | .1213 |
|     | .02 | -.02678 | .04783 | 1.000 | -.2013 | .1477 |
|     | .05 | -.09626 | .04783 | 1.000 | -.2708 | .0783 |
|     | .10 | .01802  | .04783 | 1.000 | -.1565 | .1925 |
|     | .25 | .00755  | .04783 | 1.000 | -.1670 | .1821 |
| .25 | .00 | -.06072 | .04783 | 1.000 | -.2352 | .1138 |
|     | .02 | -.03433 | .04783 | 1.000 | -.2089 | .1402 |
|     | .05 | -.10381 | .04783 | .761  | -.2783 | .0707 |
|     | .10 | .01047  | .04783 | 1.000 | -.1641 | .1850 |
|     | .15 | -.00755 | .04783 | 1.000 | -.1821 | .1670 |

## Means Plots

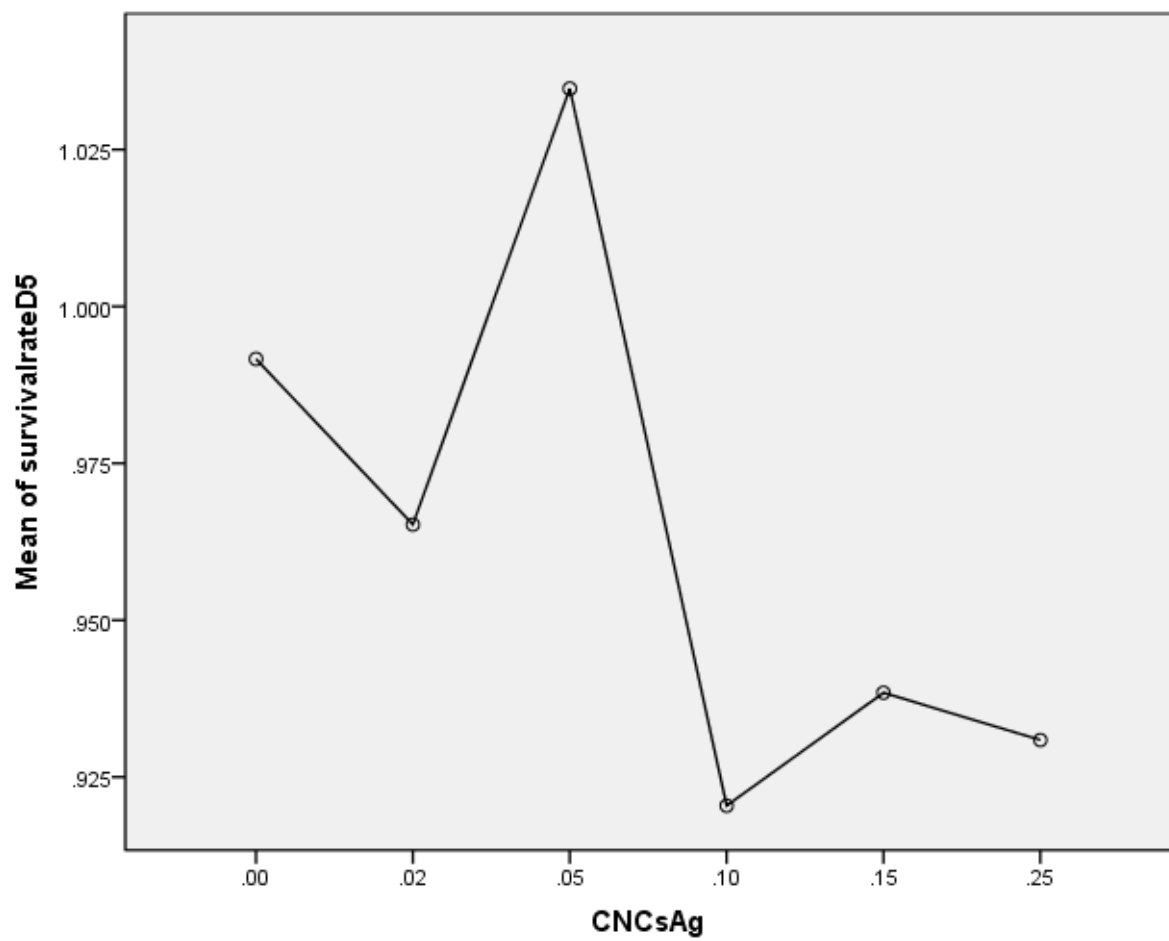

ONEWAY survivalrateD7 BY CNCsAg  
 /STATISTICS DESCRIPTIVES HOMOGENEITY  
 /PLOT MEANS  
 /MISSING ANALYSIS  
 /POSTHOC=BONFERRONI ALPHA(0.05).

## Oneway

### Descriptives

survivalrateD7

|       | N  | Mean  | Std. Deviation | Std. Error | 95% Confidence Interval for Mean |             |
|-------|----|-------|----------------|------------|----------------------------------|-------------|
|       |    |       |                |            | Lower Bound                      | Upper Bound |
| .00   | 3  | .9498 | .05066         | .02925     | .8240                            | 1.0756      |
| .02   | 3  | .9897 | .04407         | .02544     | .8802                            | 1.0992      |
| .05   | 3  | .9617 | .02038         | .01177     | .9111                            | 1.0123      |
| .10   | 3  | .9383 | .09723         | .05614     | .6967                            | 1.1798      |
| .15   | 3  | .9204 | .02689         | .01552     | .8536                            | .9872       |
| .25   | 3  | .9383 | .04565         | .02636     | .8249                            | 1.0517      |
| Total | 18 | .9497 | .05027         | .01185     | .9247                            | .9747       |

### Descriptives

survivalrateD7

|       | Minimum | Maximum |
|-------|---------|---------|
| .00   | .90     | 1.00    |
| .02   | .96     | 1.04    |
| .05   | .94     | .97     |
| .10   | .88     | 1.05    |
| .15   | .89     | .94     |
| .25   | .89     | .97     |
| Total | .88     | 1.05    |

### Test of Homogeneity of Variances

survivalrateD7

| Levene Statistic | df1 | df2 | Sig. |
|------------------|-----|-----|------|
| 3.199            | 5   | 12  | .046 |

## ANOVA

survivalrateD7

|                | Sum of Squares | df | Mean Square | F    | Sig. |
|----------------|----------------|----|-------------|------|------|
| Between Groups | .009           | 5  | .002        | .599 | .702 |
| Within Groups  | .034           | 12 | .003        |      |      |
| Total          | .043           | 17 |             |      |      |

## Post Hoc Tests

### Multiple Comparisons

Dependent Variable: survivalrateD7

Bonferroni

| (I) CNCsAg | (J) CNCsAg | Mean Difference (I-J) | Std. Error | Sig.  | 95% Confidence Interval |             |
|------------|------------|-----------------------|------------|-------|-------------------------|-------------|
|            |            |                       |            |       | Lower Bound             | Upper Bound |
| .00        | .02        | -.03991               | .04370     | 1.000 | -.1994                  | .1195       |
|            | .05        | -.01189               | .04370     | 1.000 | -.1713                  | .1476       |
|            | .10        | .01152                | .04370     | 1.000 | -.1479                  | .1710       |
|            | .15        | .02936                | .04370     | 1.000 | -.1301                  | .1888       |
|            | .25        | .01151                | .04370     | 1.000 | -.1479                  | .1710       |
| .02        | .00        | .03991                | .04370     | 1.000 | -.1195                  | .1994       |
|            | .05        | .02802                | .04370     | 1.000 | -.1314                  | .1875       |
|            | .10        | .05143                | .04370     | 1.000 | -.1080                  | .2109       |
|            | .15        | .06926                | .04370     | 1.000 | -.0902                  | .2287       |
|            | .25        | .05142                | .04370     | 1.000 | -.1080                  | .2109       |
| .05        | .00        | .01189                | .04370     | 1.000 | -.1476                  | .1713       |
|            | .02        | -.02802               | .04370     | 1.000 | -.1875                  | .1314       |
|            | .10        | .02341                | .04370     | 1.000 | -.1360                  | .1829       |
|            | .15        | .04124                | .04370     | 1.000 | -.1182                  | .2007       |
|            | .25        | .02340                | .04370     | 1.000 | -.1360                  | .1828       |
| .10        | .00        | -.01152               | .04370     | 1.000 | -.1710                  | .1479       |
|            | .02        | -.05143               | .04370     | 1.000 | -.2109                  | .1080       |
|            | .05        | -.02341               | .04370     | 1.000 | -.1829                  | .1360       |
|            | .15        | .01784                | .04370     | 1.000 | -.1416                  | .1773       |
|            | .25        | -.00001               | .04370     | 1.000 | -.1595                  | .1594       |
| .15        | .00        | -.02936               | .04370     | 1.000 | -.1888                  | .1301       |
|            | .02        | -.06926               | .04370     | 1.000 | -.2287                  | .0902       |

|     |     |  |         |        |       |        |       |
|-----|-----|--|---------|--------|-------|--------|-------|
|     | .05 |  | -.04124 | .04370 | 1.000 | -.2007 | .1182 |
|     | .10 |  | -.01784 | .04370 | 1.000 | -.1773 | .1416 |
|     | .25 |  | -.01784 | .04370 | 1.000 | -.1773 | .1416 |
| .25 | .00 |  | -.01151 | .04370 | 1.000 | -.1710 | .1479 |
|     | .02 |  | -.05142 | .04370 | 1.000 | -.2109 | .1080 |
|     | .05 |  | -.02340 | .04370 | 1.000 | -.1828 | .1360 |
|     | .10 |  | .00001  | .04370 | 1.000 | -.1594 | .1595 |
|     | .15 |  | .01784  | .04370 | 1.000 | -.1416 | .1773 |

## Means Plots

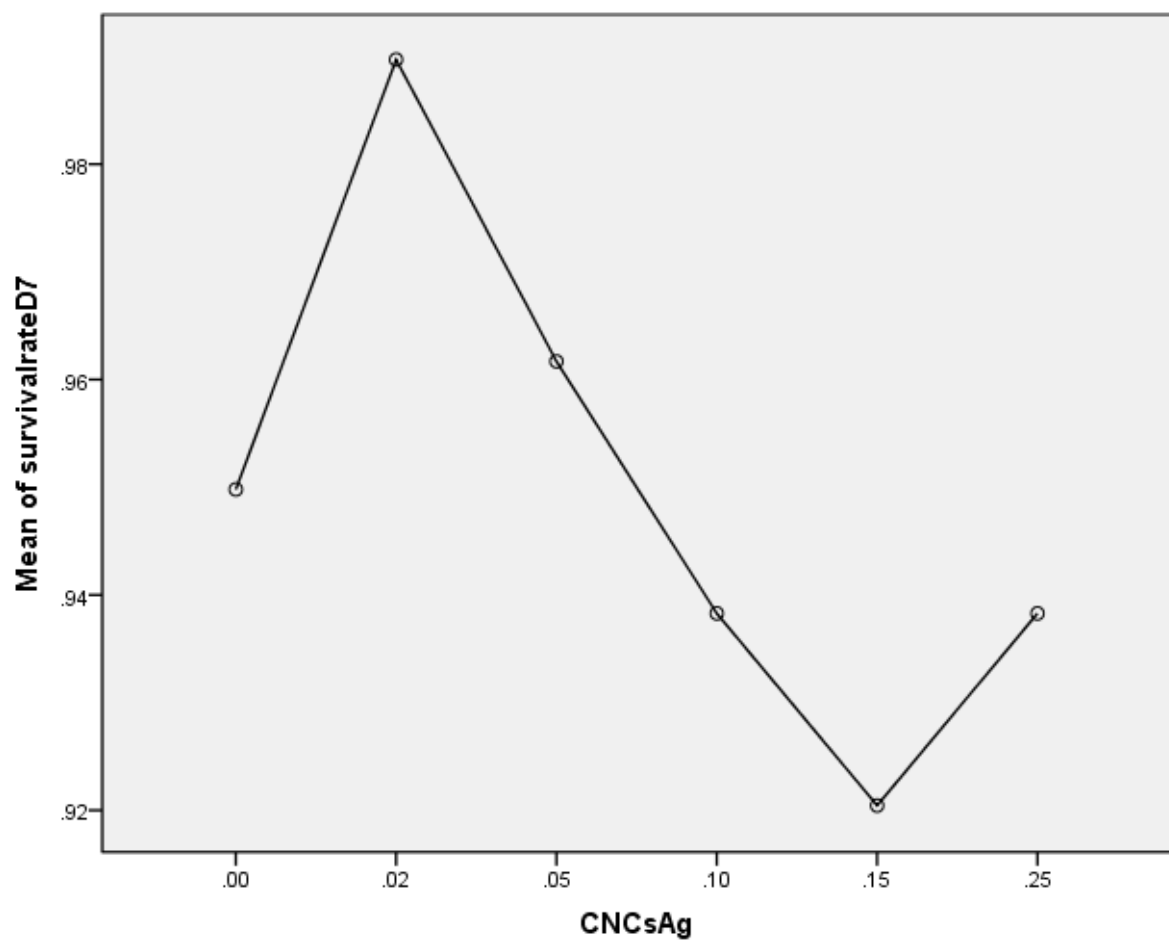

Supplement: s1 [file s1]
